# Supplementary material for: Trends in Diet and Cancer Research: A Bibliometric and Visualization Analysis
Source: MDPI journal article supplement (doi:10.3390/cancers15153761), 2023-07-25
Supplement: s1 [file s1]

| Cluster 1 - Males, animals, cellular mechanisms |             | Cluster 2 - Humans, lifestyle, risk |             | Cluster 3 – Female, age groups |             |
|-------------------------------------------------|-------------|-------------------------------------|-------------|--------------------------------|-------------|
| Keyword                                         | Occurrences | Keyword                             | Occurrences | Keyword                        | Occurrences |
| male                                            | 43990       | humans                              | 70556       | female                         | 43596       |
| animals                                         | 32668       | diet                                | 19063       | middle aged                    | 26705       |
| mice                                            | 11506       | neoplasms                           | 14054       | aged                           | 21477       |
| rats                                            | 11445       | risk factors                        | 13982       | adult                          | 20199       |
| liver                                           | 5485        | prospective studies                 | 6688        | aged, 80 and over              | 5964        |
| obesity                                         | 4782        | breast neoplasms                    | 6566        | adolescent                     | 4831        |
| carcinogens                                     | 4494        | case-control studies                | 5311        | nutritional status             | 4774        |
| colonic neoplasms                               | 4427        | colorectal neoplasms                | 4713        | retrospective studies          | 4433        |
| prostatic neoplasms                             | 4293        | surveys and questionnaires          | 4542        | treatment outcome              | 4114        |
| body weight                                     | 4247        | cohort studies                      | 3956        | follow-up studies              | 3742        |
| dietary supplements                             | 4213        | incidence                           | 3791        | stomach neoplasms              | 3681        |
| dietary fats                                    | 4121        | feeding behavior                    | 3442        | prognosis                      | 3665        |
| antioxidants                                    | 4016        | united states                       | 3393        | child                          | 3336        |
| time factors                                    | 3997        | body mass index                     | 3326        | young adult                    | 3217        |
| liver neoplasms                                 | 3831        | smoking                             | 3292        |                                |             |
| disease models, animal                          | 3525        | life style                          | 3066        |                                |             |
| mice, inbred c57bl                              | 3499        | energy intake                       | 2992        |                                |             |
| inflammation                                    | 3442        |                                     |             |                                |             |
| adenocarcinoma                                  | 3240        |                                     |             |                                |             |

Figure S1. MeSH generated key words.

| Cluster 1 – Inflammation, obesity, metabolic conditions |             | Cluster 2 - Nutrition status, treatment, treatment outcomes |             | Cluster 3 - General lifestyle and study design terms |             | Cluster 4 – General field terms |             |
|---------------------------------------------------------|-------------|-------------------------------------------------------------|-------------|------------------------------------------------------|-------------|---------------------------------|-------------|
| Keyword                                                 | Occurrences | Keyword                                                     | Occurrences | Keyword                                              | Occurrences | Keyword                         | Occurrences |
| inflammation                                            | 1887        | nutrition                                                   | 1460        | diet                                                 | 1655        | cancer                          | 2662        |
| obesity                                                 | 1639        | gastric cancer                                              | 659         | breast cancer                                        | 1327        | neoplasms                       | 292         |
| colorectal cancer                                       | 1335        | malnutrition                                                | 642         | mortality                                            | 643         | health                          | 230         |
| oxidative stress                                        | 812         | quality of life                                             | 506         | prostate cancer                                      | 587         | biology                         | 226         |
| apoptosis                                               | 709         | prognosis                                                   | 504         | epidemiology                                         | 570         | diseases                        | 222         |
| hepatocellular carcinoma                                | 499         | chemotherapy                                                | 459         | physical activity                                    | 488         | physiology                      | 209         |
| diabetes                                                | 442         | head and neck cancer                                        | 397         | meta-analysis                                        | 456         |                                 |             |
| insulin resistance                                      | 424         | survival                                                    | 380         | exercise                                             | 375         |                                 |             |
| gut microbiota                                          | 420         | sarcopenia                                                  | 374         | risk factors                                         | 367         |                                 |             |
| colon cancer                                            | 397         | nutritional status                                          | 357         | cardiovascular disease                               | 356         |                                 |             |
| chemoprevention                                         | 363         | pancreatic cancer                                           | 345         | prevention                                           | 293         |                                 |             |
| metabolism                                              | 328         | cachexia                                                    | 286         | lifestyle                                            | 286         |                                 |             |
| high-fat diet                                           | 327         | weight loss                                                 | 260         | mediterranean diet                                   | 286         |                                 |             |
| metabolic syndrome                                      | 321         | radiotherapy                                                | 243         |                                                      |             |                                 |             |
| aging                                                   | 258         | body mass index                                             | 211         |                                                      |             |                                 |             |
| epigenetics                                             | 241         |                                                             |             |                                                      |             |                                 |             |

**Figure S2.** Author-generated keywords.

| Supplemental Table S1. Search terms within the main query used to identify specific cancer types |                                                                                                                                                                                                 |                                                                                                                                                                                                                                                                               |                       |
|--------------------------------------------------------------------------------------------------|-------------------------------------------------------------------------------------------------------------------------------------------------------------------------------------------------|-------------------------------------------------------------------------------------------------------------------------------------------------------------------------------------------------------------------------------------------------------------------------------|-----------------------|
| Cancer Type                                                                                      | Term(s) Queried in MeSH Field                                                                                                                                                                   | Terms Queried in Abstracts ( "   " means "OR"; "." means any character; " * " means includes letters after stem word)                                                                                                                                                         | # of Records Returned |
| Bladder                                                                                          | Urinary Bladder Neoplasms                                                                                                                                                                       | bladder cancer. cancer of the bladder bladder tumor bladder tumour                                                                                                                                                                                                            | 1451                  |
| Brain / Glioblastoma                                                                             | Glioblastoma<br>Brain Neoplasms<br>Central Nervous System Neoplasms                                                                                                                             | glioblastoma. brain cancer. brain tumor. brain tumour. brain neoplasm. meningioma glioma astrocytic tumor* astrocytoma ependymoma meningeal tumor* oligodendroglioma                                                                                                          | 879                   |
| Breast                                                                                           | Breast Neoplasms<br>Mammary Neoplasms, Animal                                                                                                                                                   | breast cancer. breast tumor. breast tumour. breast neoplas. mammary cancer. mammary tumor. mammary tumour mammary neoplas. ductal carcinoma lobular carcinoma DCIS                                                                                                            | 10373                 |
| Cervical                                                                                         | Uterine Cervical Neoplasms<br>Cervical Intraepithelial Neoplasia                                                                                                                                | cervical cancer. cancer of the cervix cervical neoplas* cervical intraepithelial neoplas* cervix dysplasia                                                                                                                                                                    | 1333                  |
| Colorectal                                                                                       | Colorectal Neoplasms<br>Intestinal Polyps                                                                                                                                                       | colorectal cancer. colorectal tumor. colorectal tumour. colon cancer. rectal cancer.                                                                                                                                                                                          | 11942                 |
| Endometrial                                                                                      | Endometrial Neoplasms                                                                                                                                                                           | endometrial cancer. endometrial tumor. endometrial tumour. endometrial carcinoma                                                                                                                                                                                              | 1609                  |
| Esophageal cancer                                                                                | Esophageal Neoplasms                                                                                                                                                                            | esophageal cancer. esophageal tumor. tumor of the esophagus esophag. cancer                                                                                                                                                                                                   | 2881                  |
| Gallbladder                                                                                      | Gallbladder Neoplasms<br>Biliary Tract Neoplasms                                                                                                                                                | Gallbladder cancer. cancer of the gallbladder gallbladder neoplasm gallbladder carcinoma gallbladder tumor*                                                                                                                                                                   | 387                   |
| Kidney                                                                                           | Kidney Neoplasms<br>Urethral Neoplasms                                                                                                                                                          | kidney cancer. renal cancer. kidney tumor* renal tumor* Wilms tumor* grawitz tumor* hypernephroma renal cell carcinoma transitional cell carcinoma urothelial cancer. urothelial carcinoma                                                                                    | 1097                  |
| Liver                                                                                            | Liver Neoplasms<br>Liver Neoplasms, Experimental                                                                                                                                                | liver cancer.  hepatic cancer. liver tumor* hepatic tumor* hepatocarcinoma hepatocellular carcinoma hepatoma cholangiocarcinoma                                                                                                                                               | 7178                  |
| Lung                                                                                             | Lung Neoplasms                                                                                                                                                                                  | lung cancer. lung tumor* pulmonary tumor pulmonary tumour small cell carcinoma of the lung                                                                                                                                                                                    | 4014                  |
| Leukemia                                                                                         | Leukemia                                                                                                                                                                                        | leukemia.                                                                                                                                                                                                                                                                     | 1872                  |
| Mouth, Nasopharynx, & Larynx                                                                     | Head and Neck Neoplasms <br>Laryngeal Neoplasms <br>Pharyngeal Neoplasms <br>Mouth Neoplasms <br>Tongue Neoplasms <br>Oropharyngeal Neoplasms <br>Hypopharyngeal Neoplasms <br>Oral Leukoplakia | mouth cancer. oral cancer.  oral tumor* nasopharyngeal cancer. nasopharyngeal tumor* pharyn. tumor* larynx tumor*                                                                                                                                                             | 3282                  |
| Ovarian                                                                                          | Ovarian Neoplasms                                                                                                                                                                               | ovarian cancer. ovarian tumor* tumor of the ovar. tumour of the ovar.  Endometrioid carcinoma  cystoadenoma.  cystadenocarcinoma.  Androblastoma.  arrhenoblastoma*  sertoli.leydig  Brenner  granulosa cell tumor*  luteoma*  luteinoma*                                     | 1242                  |
| Pancreatic                                                                                       | Pancreatic Neoplasms                                                                                                                                                                            | pancreatic neoplas* pancreas neoplas* pancreatic cancer* pancreas cancer* pancreatic carcin* pancreas carcin* pancreatic tumor* pancreas tumor* pancreatic metasta* pancreas metasta* pancreatic malign* pancreas malign* pancreatic adenocarcinoma* pancreas adenocarcinoma* | 2412                  |
| Prostate                                                                                         | Prostatic Neoplasms                                                                                                                                                                             | prostate cancer. prostate tumor* prostatic tumor* prostatic adenocarcinoma prostatic carcinoma prostatic cancer. prostate neoplasm* prostatic neoplasm*                                                                                                                       | 5321                  |
| Skin                                                                                             | Skin Neoplasms                                                                                                                                                                                  | skin cancer. skin tumor*  melanoma.   basal.cell.carcinoma.  merkel.cell.carcinoma  cutaneous.T.cell.lymphoma.                                                                                                                                                                | 1751                  |
| Stomach                                                                                          | Stomach Neoplasms                                                                                                                                                                               | stomach cancer. stomach tumor. stomach tumour. gastric cancer.  gastric carcinoma. gastrointestinal stromal tumor*                                                                                                                                                            | 4765                  |

| Supplemental Table S2. Search terms within the main query used to identify dietary energy modulation or pattern |                                                                                                                                                                                |                       |
|-----------------------------------------------------------------------------------------------------------------|--------------------------------------------------------------------------------------------------------------------------------------------------------------------------------|-----------------------|
| Diet MeSH term                                                                                                  | Terms Queried in Abstracts ( "   " means "OR"; "." means any character; " * " means includes letters after stem word)                                                          | # of Records Returned |
| <b>Dietary energy modulation</b>                                                                                |                                                                                                                                                                                |                       |
| Caloric Restriction                                                                                             | caloric.restriction  energy.restrict.  calorically.restricted  energy.restricted  low.calorie  low.caloric  low.energy.diet  hypocaloric                                       | 965                   |
| Ketogenic or low-carbohydrate                                                                                   | ketogenic  keto diet  ketosis  low.carb*  carbohydrate.restricted  reduced.carbohydrate  high.protein.diet  diet high in protein  Atkins diet                                  | 1312                  |
| High Fat                                                                                                        | high.fat  diet. high.in.fat HF.diet HFD                                                                                                                                        | 4936                  |
| Low Fat                                                                                                         | low fat diet. low in fat LF.diet LFD                                                                                                                                           | 355                   |
| <b>Diet pattern</b>                                                                                             |                                                                                                                                                                                |                       |
| DASH Diet                                                                                                       | dash diet   dietary approaches to stop hypertension                                                                                                                            | 137                   |
| Gluten Free                                                                                                     | gluten.free  gluten-free  gluten.restrict*                                                                                                                                     | 307                   |
| Healthy Diet Patterns                                                                                           | healty.eating.index  healthy.diet  healthy.lifestyle.index  prudent.diet.  diet.quality  diet.score                                                                            | 1460                  |
| Mediterranean Diet                                                                                              | mediterranean.diet  mediterranean eating  mediterranean.style.diet  meddiet                                                                                                    | 1045                  |
| Paleolithic                                                                                                     | paleo.diet. paleolithic.diet*                                                                                                                                                  | 17                    |
| Plant Based                                                                                                     | vegetarian* vegan macrobiotic plant.based                                                                                                                                      | 919                   |
| Time Restricted                                                                                                 | alternate.day.fasting time.restricted fasting.mimicking intermittent.energy.restriction intermittent.calorie.restriction intermittent.caloric.restriction intermittent.feeding | 95                    |
| Western Diet                                                                                                    | western.diet.  western.style.diet.  western.pattern.diet.  american.diet  cafeteria.diet  CAF.diet  obesogenic diet                                                            | 975                   |

| Supplemental Table S3. Search terms within the main query used to identify dietary components |                                                                                                                    |                       |
|-----------------------------------------------------------------------------------------------|--------------------------------------------------------------------------------------------------------------------|-----------------------|
| Diet Term                                                                                     | Search Term ( "   " means "OR"; "." means any character; " * " means includes letters after stem word)             | # of Records Returned |
| Alcohol                                                                                       | alcohol wine liquor beer                                                                                           | 7243                  |
| Carbohydrates                                                                                 | dietary carbohydrate. carbohydrate bread pasta                                                                     | 2965                  |
| Chocolate                                                                                     | chocolate cocoa                                                                                                    | 154                   |
| Coffee/Tea                                                                                    | coffee.tea                                                                                                         | 2885                  |
| Dairy                                                                                         | dairy products milk cheese cultured milk product.  yogurt yoghurt                                                  | 2224                  |
| Dietary Fat/Oil                                                                               | dietary fat butter ghee cholesterol oil margarine                                                                  | 4978                  |
| Dietary Fiber                                                                                 | fibre fiber wheat bran. roughage. resistant starch                                                                 | 3773                  |
| Fish/Seafood                                                                                  | fish seafood shellfish                                                                                             | 3453                  |
| Fried Food                                                                                    | fried.food.                                                                                                        | 114                   |
| Fruit                                                                                         | fruit berry berries citrus melon. pome.                                                                            | 8203                  |
| Genetically Modified                                                                          | genetically.modified food genetically.modified organism GMF GMO                                                    | 376                   |
| Honey                                                                                         | honey                                                                                                              | 114                   |
| Nuts                                                                                          | nuts seeds                                                                                                         | 946                   |
| Organic Food                                                                                  | organic                                                                                                            | 870                   |
| Plant Protein                                                                                 | plant.protein plant.derived.protein plant.based.protein pea.protein vegetable.protein                              | 150                   |
| Poultry                                                                                       | poultry chicken turkey duck goose                                                                                  | 847                   |
| Processed Food                                                                                | processed.food fast food convenience.food. ready.to.eat ready.prepared.food.                                       | 301                   |
| Red Meat                                                                                      | red.meat beef lamb goat veal                                                                                       | 1531                  |
| Refined Grain                                                                                 | refined.grain white.flour refined.carbohydrate                                                                     | 256                   |
| Saturated Fat                                                                                 | saturated.fat saturated.dietary.fat                                                                                | 1318                  |
| Soy                                                                                           | soy natto tempeh tofu bean.curd miso                                                                               | 1162                  |
| Spices                                                                                        | spice. seasoning                                                                                                   | 467                   |
| Sugar                                                                                         | dietary sugar dietary sucrose table sugar white sugar added sugar. corn syrup sugar.sweetened.beverage. soda  cola | 333                   |
| Unsaturated Fat                                                                               | unsaturated.dietary.fat. dietary.oil. oil oils dietary.omega.3 omega.3.fatty.acid. MUFA PUFA                       | 3940                  |
| Vegetables                                                                                    | vegetable.                                                                                                         | 6714                  |
| Whole Grain                                                                                   | whole.grain wholegrain whole.wheat whole.meal unrefined grain. coarse.grain unprocessed.grain                      | 731                   |

| <b>Supplemental Table S4. Search terms within the main query used to identify diet nutrients, supplements, and vitamins</b> |                                                                                                                                                                                                                                                                                                                                                                                                                                                                                    |                              |
|-----------------------------------------------------------------------------------------------------------------------------|------------------------------------------------------------------------------------------------------------------------------------------------------------------------------------------------------------------------------------------------------------------------------------------------------------------------------------------------------------------------------------------------------------------------------------------------------------------------------------|------------------------------|
| <b>Diet Term</b>                                                                                                            | <b>Search Term ( "   " means "OR"; "." means any character; " * " means includes letters after stem word)</b>                                                                                                                                                                                                                                                                                                                                                                      | <b># of Records Returned</b> |
| Dietary Supplements                                                                                                         | dietary.supplement* food.supplement* nutraceutical. neutraceutical. herbal.supplement.                                                                                                                                                                                                                                                                                                                                                                                             | 3104                         |
| Micronutrients                                                                                                              | micronutrient.                                                                                                                                                                                                                                                                                                                                                                                                                                                                     | 1222                         |
| Minerals                                                                                                                    | mineral.                                                                                                                                                                                                                                                                                                                                                                                                                                                                           | 1445                         |
| Phytochemicals                                                                                                              | dietary.phytochemical. plant.bioactive.compound. plant.biologically.active.compound. plant.derived.chemical. plant.derived.chemicals plant.bioactive.coumpound. phytochemical. phytonutrient. plant.derived.compound. flavanol. flavonoid. polyphenol. carotenoid  alkaloid amines cyanogenic.glycosides diterpenes glucosinolate. monoterpenes non-protein amino acids phenylpropanes polyacetylenes polyketides sesquiterpenes tetraterpenes triterpenes saponins plant steroids | 7801                         |
| Prebiotics                                                                                                                  | prebiotic.                                                                                                                                                                                                                                                                                                                                                                                                                                                                         | 378                          |
| Probiotics                                                                                                                  | probiotic.                                                                                                                                                                                                                                                                                                                                                                                                                                                                         | 751                          |
| Synbiotics                                                                                                                  | synbiotic.                                                                                                                                                                                                                                                                                                                                                                                                                                                                         | 109                          |
| Vitamins                                                                                                                    | vitamin.                                                                                                                                                                                                                                                                                                                                                                                                                                                                           | 7240                         |

**Supplemental Table S5. Summary of the relevant gaps in the diet and cancer literature**

| Cancer Type       | Diet Type   |                 |      |             |         |               |                     |             |                |                    |                | Diet Component |           |     |               |           |               |       |            |        |             |         |               |     |      |         |          |       |        |      | Micronutrients  |            |            |            |          |                |                |             |          |
|-------------------|-------------|-----------------|------|-------------|---------|---------------|---------------------|-------------|----------------|--------------------|----------------|----------------|-----------|-----|---------------|-----------|---------------|-------|------------|--------|-------------|---------|---------------|-----|------|---------|----------|-------|--------|------|-----------------|------------|------------|------------|----------|----------------|----------------|-------------|----------|
|                   | Paleolithic | Time Restructed | DASH | Gluten Free | Low Fat | Western-Style | Calorie Restriction | Plant Based | Healthy Eating | Mediterranean Diet | Ketogenic Diet | Honey          | Chocolate | GMO | Plant Protein | Processed | Refined Grain | Sugar | Fried Food | Spices | Whole Grain | Organic | Saturated Fat | Soy | Nuts | Poultry | Red Meat | Dairy | Coffee | Fish | Unsaturated Fat | Synbiotics | Prebiotics | Probiotics | Minerals | Micronutrients | Phytochemicals | Supplements | Vitamins |
| Bladder           | X           | X               | X    | X           | X       | X             | X                   |             |                |                    |                | X              | X         | X   | X             | X         | X             | X     | X          | X      | X           |         | X             |     | X    | X       |          |       |        |      |                 | X          | X          | X          |          |                |                |             |          |
| Brain             | X           | X               | X    | X           | X       | X             |                     | X           | X              | X                  |                | X              | X         | X   | X             | X         | X             | X     | X          | X      | X           | X       | X             | X   | X    | X       |          | X     |        |      |                 | X          | X          | X          | X        | X              |                |             |          |
| Breast            | X           |                 |      | X           |         |               |                     |             |                |                    |                | X              |           | X   |               |           |               |       |            |        |             |         |               |     |      |         |          |       |        |      |                 | X          |            |            |          |                |                |             |          |
| Cervical          | X           | X               | X    | X           | X       | X             | X                   | X           | X              | X                  | X              | X              | X         | X   | X             | X         | X             | X     | X          | X      | X           | X       | X             | X   | X    | X       | X        |       | X      | X    | X               | X          | X          | X          | X        |                |                |             |          |
| Colorectal        | X           |                 |      |             |         |               |                     |             |                |                    |                | X              |           |     | X             |           |               |       |            |        |             |         |               |     |      |         |          |       |        |      |                 |            | X          |            | X        |                |                |             |          |
| Endometrial       | X           | X               | X    | X           | X       |               |                     |             |                |                    |                | X              | X         | X   | X             | X         | X             | X     | X          | X      |             | X       |               |     |      |         | X        |       |        |      |                 |            | X          | X          | X        |                |                |             |          |
| Esophageal        | X           | X               | X    |             | X       | X             | X                   |             |                |                    |                | X              | X         | X   | X             | X         | X             | X     |            | X      | X           | X       | X             | X   |      |         |          |       |        |      |                 |            | X          | X          | X        |                |                |             |          |
| Gallbladder       | X           | X               | X    | X           | X       | X             | X                   | X           | X              | X                  |                | X              | X         | X   | X             | X         | X             | X     | X          | X      | X           | X       | X             | X   | X    | X       | X        | X     | X      |      |                 |            | X          | X          | X        | X              | X              | X           |          |
| Kidney            | X           | X               | X    | X           | X       | X             |                     | X           | X              | X                  |                | X              | X         | X   | X             | X         | X             | X     | X          | X      | X           | X       | X             | X   | X    | X       |          |       |        |      |                 |            | X          | X          | X        |                |                |             |          |
| Leukemia          | X           | X               | X    |             | X       | X             |                     | X           |                |                    |                | X              | X         | X   | X             | X         | X             | X     | X          |        | X           | X       | X             | X   | X    |         |          |       |        |      |                 |            | X          | X          | X        |                |                |             |          |
| Liver             | X           | X               | X    | X           |         |               |                     |             |                |                    |                | X              | X         | X   | X             | X         | X             | X     | X          |        | X           |         |               |     |      |         |          |       |        |      |                 |            | X          | X          | X        |                |                |             |          |
| Lung              | X           | X               |      | X           |         |               |                     |             |                |                    |                | X              | X         | X   | X             | X         | X             | X     |            |        | X           |         |               |     |      |         |          |       |        |      |                 |            | X          | X          | X        |                |                |             |          |
| Mouth/Nasopharynx | X           | X               | X    | X           | X       | X             | X                   |             |                |                    |                | X              | X         | X   | X             | X         | X             | X     |            |        | X           | X       | X             | X   | X    |         |          |       |        |      |                 |            | X          | X          | X        |                |                |             |          |
| Ovarian           | X           | X               | X    | X           |         |               |                     |             |                |                    |                | X              | X         |     | X             | X         | X             | X     | X          | X      |             | X       |               |     | X    |         |          |       |        |      |                 |            | X          | X          | X        | X              |                |             |          |
| Pancreatic        | X           | X               | X    |             |         |               |                     |             |                |                    |                | X              | X         | X   | X             | X         | X             | X     | X          | X      | X           |         |               |     |      |         |          |       |        |      |                 |            | X          | X          | X        |                |                |             |          |
| Prostate          | X           | X               | X    | X           |         |               |                     |             |                |                    |                | X              | X         | X   |               | X         |               |       | X          | X      |             |         |               |     |      |         |          |       |        |      |                 |            | X          | X          | X        |                |                |             |          |
| Skin              | X           | X               | X    | X           |         |               |                     |             |                |                    |                | X              | X         | X   | X             | X         | X             | X     | X          | X      | X           |         | X             | X   |      | X       | X        |       |        |      |                 |            | X          | X          | X        |                |                |             |          |
| Stomach           | X           | X               | X    |             | X       |               |                     |             |                |                    |                | X              | X         | X   | X             | X         | X             | X     | X          |        |             |         |               |     |      |         |          |       |        |      |                 |            | X          | X          |          |                |                |             |          |

X indicates a low number or no papers identified in our analysis for this combination of cancer and diet term
